# Supplementary material
Source: publisher figshare collection journal article supplement (https://geolsoc.figshare.com/ndownloader/files/16751288)
Supplement: Supplementary file 1 [file 16751288]

#Set working directory to the folder containing Full_data.csv
setwd("C:/Users/Matthew/Documents/Work/2018-02 Variance modelling/2018-10-02 Draft 4/Supplementary Data/")
full_data<-read.csv("Fluid-excess.csv")
natural<-full_data[which(full_data[,"Type"]=="Natural s-type granite"),]
natural<-data.matrix(natural)
modelled<-full_data[which(full_data[,"Type"]=="Modelled melt extract"),]
modelled<-data.matrix(modelled)
#make sure the below packages are installed
library(alphahull)
# Plot full outputs against SiO2 given datasets: modelled and natural, alter variables below as required
to_file<-TRUE
one_file<-TRUE
limits<-TRUE
alpha<-150
vectors<-c("Mg.","An.","An.","P.T.path","Melt.loss")[c(1,2,3,4,5)]
oxides<-c("CaO","Na2O","K2O","Al2O3","mg.","A.CNK_manual","MgO.FeOt","Na.Ca")[1:3]
x_limits<-rep(c(55,80),8)
y_limits<-c(0,8,0,8,0,12,10,25,0,100,0,3,0,15,0,50)[1:6]
plot_vec_shape<-FALSE
#colours in order: natural points, vec_0 points, vec_1 points, vec_2 points, vec_0 shape, vec_1 shape, vec_2 shape, vec_0 vertex, vec_1 vertex, vec_2 vertex
#blues
cols<-c(2,'#a1dab4','#41b6c4','#225ea8','#a1dab4','#41b6c4','#225ea8','#cccccc','#969696','#525252')
#greys
#cols<-c(2,'#cccccc','#969696','#525252','#cccccc','#969696','#525252',26,25,23)
#The function plotting below, do not alter
if(one_file){
if(to_file){
postscript(file=paste("fluid-excess_1.ps",sep=""),onefile=TRUE,horizontal=TRUE)
}
if(!to_file){dev.new()}
par(mfcol=c(length(oxides),length(vectors)))
}
for(vec in vectors){
#subset modelled space
vec_0<-modelled[which(modelled[,vec]==0),]
vec_1<-modelled[which(modelled[,vec]==1),]
vec_2<-modelled[which(modelled[,vec]==2),]
for(ox in oxides){
nat_points<-natural[,c("SiO2",ox)]
if(!one_file){if(!to_file){dev.new()}}
if(!one_file){if(to_file){
postscript(file=paste(getwd(),"/",vec,"_",ox,".ps",sep=""),onefile=TRUE,horizontal=TRUE)}else{
}}
if(limits){plot(nat_points,xlab="",ylab="",pch=20,cex=0.75,col=cols[1],xlim=c(x_limits[which(oxides==ox)*2-1],x_limits[which(oxides==ox)*2]),ylim=c(y_limits[which(oxides==ox)*2-1],y_limits[which(oxides==ox)*2]))
}else{plot(nat_points,xlab="",ylab="",pch=20,col=cols[1],xlim=c(min(full_data[,"SiO2"],na.rm=TRUE),max(full_data[,"SiO2"],na.rm=TRUE)),ylim=c(min(full_data[,ox],na.rm=TRUE),max(full_data[,ox],na.rm=TRUE)))
}
nat_in_vec_x<-NULL
vec_co_ord<-NULL
vec_col<-2
for(vec_x in c("vec_0","vec_1","vec_2","modelled")){
vec_x_points<-eval(parse(text=paste0(vec_x,"[,c(\"SiO2\",ox)]")))
#remove zero values
vec_x_points<-vec_x_points[which(vec_x_points[,2]!=0),c("SiO2",ox)]
#reorder extremes first to ensure hull
extremes<-unique(c(which(vec_x_points[,1]==max(vec_x_points[,1]))[[1]],which(vec_x_points[,2]==max(vec_x_points[,2]))[[1]],which(vec_x_points[,1]==min(vec_x_points[,1]))[[1]],which(vec_x_points[,2]==min(vec_x_points[,2]))[[1]]))
vec_x_points<-rbind(vec_x_points[extremes,],vec_x_points[-extremes,])
vec_x_shape<-0
class(vec_x_shape)<-"try-error"
ahull_count<-0
while(class(vec_x_shape)=="try-error"){
#randomly sample points until successfully get ahull, try a maximum of 20 times
ahull_count<-ahull_count+1
vec_x_shape<-try(ahull(unique(vec_x_points[sample(1:nrow(vec_x_points)),]),alpha=alpha),silent=TRUE)
if(ahull_count>=20){break}
}
if(class(vec_x_shape)!="try-error"){
in_vec_x<-inahull(vec_x_shape,nat_points)
}else{
in_vec_x<-0
}
nat_in_vec_prop<-sum(in_vec_x)/length(in_vec_x)*100
nat_in_vec_x<-c(nat_in_vec_x,nat_in_vec_prop)
#plot shape and points
if(plot_vec_shape){
plot(vec_x_shape,add=TRUE,wpoints=FALSE,col=cols[vec_col+3],xlab="",ylab="",)
}
if(vec_x!="modelled"){
points(vec_x_points,pch=1,cex=0.6,col=cols[vec_col])
}
#calculate vectors
x_mid<-(max(vec_x_points[,"SiO2"])-min(vec_x_points[,"SiO2"]))/2+min(vec_x_points[,"SiO2"])
y_mid<-(max(vec_x_points[,ox])-min(vec_x_points[,ox]))/2+min(vec_x_points[,ox])
vec_co_ord<-rbind(vec_co_ord,matrix(c(x_mid,y_mid),1,2))
points(x_mid,y_mid,pch=6,col=cols[vec_col+6])
vec_col<-vec_col+1
print(paste0("completed ",vec," for ",ox,"\n"))
}
lines(vec_co_ord[-4,])
title(main=paste(vec,sep=" "),sub=paste(round(nat_in_vec_x,0),collapse=" "),xlab="SiO2",ylab=ox)
if(!one_file){if(to_file){dev.off()}}
}
}
if(one_file){if(to_file){dev.off()}}
